# Supplementary material for: Genome-wide identification, expression profiles and regulatory network of MAPK cascade gene family in barley
Source: PubMed Central journal article supplement (PMC6796406; doi:10.1186/s12864-019-6144-9), 2019-10-17
Supplement: 12864_2019_6144_MOESM1_ESM.pdf [file 12864_2019_6144_MOESM1_ESM.pdf]

|          | 200                          | 210                                | 220                  | 230                           | 240         |
|----------|------------------------------|------------------------------------|----------------------|-------------------------------|-------------|
| HvMAPK1  | AR T T S E . . . . T D L M   | <b>TE Y V V T R W Y R A P E L</b>  | LL N C . S Q Y T A   | A I D V W S V G C I L G E I I | T R Q P L F |
| HvMAPK8  | AR T N S S K . . . . G Q F M | <b>TE Y V V T R W Y R A P E L</b>  | LL C C . D N Y G T S | I D V W S V G C I F A E L L   | G R K P I F |
| HvMAPK9  | AR P . S S E . . . . S D M M | <b>TE Y V V T R W Y R A P E L</b>  | LL N S . T D Y S A   | A I D V W S V G C I F M E L I | N R A P L F |
| HvMAPK10 | . . . . . M                  | <b>TE Y V V T R W Y R A P E L</b>  | LL S F . D K Y G T S | V D V W S V G C I F A E L L   | G R K S I F |
| HvMAPK13 | AR T N S S K . . . . G Q F M | <b>TE Y V V T R W Y R A P E L</b>  | LL C C . D N Y G T S | I D V W S V G C I F A E L L   | G R K P I F |
| HvMAPK14 | AR E V S S A . . . . P P Y   | <b>TE Y V S T R W Y R A P E V</b>  | LL Q S . S A Y D S   | A V D M W A M G A I M A E L L | T L H P L F |
| HvMAPK15 | AR E I I S E . . . . P P Y   | <b>TE Y V S T R W Y R A P E V</b>  | LL Q S . S V Y S S   | A V D M W A M G A I I A E L F | S H R P L F |
| HvMAPK16 | AR T T S E . . . . T D F M   | <b>TE Y V V T R W Y R A P E L</b>  | LL N S . S E Y T A   | A I D V W S V G C I F M E L M | D R K P L F |
| HvMAPK19 | AR T N N T K . . . . G Q F M | <b>TE Y V V T R W Y R A P E L</b>  | LL C C . D N Y G T S | I D V W S V G C I F A E L L   | G R K P I F |
| HvMAPK20 | AR E V S S A . . . . P P Y   | <b>TE Y V S T R W Y R A P E V</b>  | LL Q S . S A Y D S   | A V D M W A M G A I M A E L L | T L H P L F |
| HvMAPK2  | AR V A F N D . T P T T V F W | <b>T D Y V A T R W Y R A P E L</b> | C G S F F T K Y S P  | A I D T W S I G C I F A E I L | T G K P L F |
| HvMAPK3  | AR V S F N D G A P S A I F W | <b>T D Y V A T R W Y R A P E L</b> | C G S F F S K Y T P  | A I D I W S V G C I F A E M L | T G K P L F |
| HvMAPK4  | AR V A F N D . T P T T V F W | <b>T D Y V A T R W Y R A P E L</b> | C G S F F T K Y T P  | A I D I W S I G C I F A E V L | T G K P L F |
| HvMAPK5  | AR V A F N D . T P T T I F W | <b>T D Y V A T R W Y R A P E L</b> | C G S F F S K Y T P  | A I D V W S I G C I F A E V L | T G K P L F |
| HvMAPK6  | AR V S F N D . T P S A I F W | <b>T D Y V A T R W Y R A P E L</b> | C G S F F S K Y T P  | A I D I W S I G C I F A E M L | S G R P L F |
| HvMAPK7  | AR V A F N D . T P T T V F W | <b>T D Y V A T R W Y R A P E L</b> | C G S F F T K Y S P  | A I D I W S I G C I F A E I L | T G K P L F |
| HvMAPK11 | AR E V C S T . . . . P P Y   | <b>T D Y V S T R W Y R A P E V</b> | LL Q A . S A Y T P S | I D M W A I G A I L A E L F   | T L S P L F |
| HvMAPK12 | AR A S R D D . V P S A I F W | <b>T D Y V A T R W Y R A P E L</b> | C G S F F S K V H P  | C D . . . . .                 | . . . . .   |
| HvMAPK17 | AR V A F N D . A P T T V F W | <b>T D Y V A T R W Y R A P E L</b> | C G S F Y S K Y T P  | A I D I W S I G C I F A E V L | I G K P L F |
| HvMAPK18 | AR V S F N D . A P S A I F W | <b>T D Y V A T R W Y R A P E L</b> | C G S F F S K Y T P  | A I D I W S I G C I F A E L L | T G R P L F |

T  
E  
Y  
  
T  
D  
Y

TXY
