# Supplementary material for: Genome-wide identification, expression profiles and regulatory network of MAPK cascade gene family in barley
Source: PubMed Central journal article supplement (PMC6796406; doi:10.1186/s12864-019-6144-9), 2019-10-17
Supplement: 12864_2019_6144_MOESM3_ESM.pdf [file 12864_2019_6144_MOESM3_ESM.pdf]

|          | 190 | 200 | 210 | 220 | 230 | 240 |   |   |   |   |   |   |   |   |   |   |   |   |   |   |   |   |   |   |   |   |   |   |   |   |   |   |   |   |   |   |   |   |   |   |   |   |   |   |   |   |   |   |   |   |   |   |   |   |   |   |   |   |   |   |
|----------|-----|-----|-----|-----|-----|-----|---|---|---|---|---|---|---|---|---|---|---|---|---|---|---|---|---|---|---|---|---|---|---|---|---|---|---|---|---|---|---|---|---|---|---|---|---|---|---|---|---|---|---|---|---|---|---|---|---|---|---|---|---|---|
| HvMAPKK1 | F   | C   | R   | D   | G   | Q   | R | R | P | P | R | V | S | I | A | V | G | T | A | Y | M | S | P | E | R | F | A | P | N | A | Q | A | G | S | R | G | A | C | A | D | V | W | S | L | G | V | T | V | L | E | L | F | L | G | H | R | P | V |   |   |
| HvMAPKK2 | L   | N   | .   | .   | .   | .   | K | T | M | D | P | C | N | S | S | V | G | T | I | A | Y | M | S | P | E | R | I | N | T | D | I | N | D | A | T | Y | D | G | Y | A | G | D | I | W | S | F | G | L | S | I | L | E | F | Y | L | G | R | F | P | F |
| HvMAPKK3 | L   | D   | .   | .   | .   | .   | N | T | M | A | M | C | A | T | F | V | G | T | V | T | Y | M | S | P | E | R | I | R | N | E | N | Y | S | . | . | . | . | . | Y | A | D | I | W | S | L | G | L | T | I | L | E | C | A | T | G | K | F | P | Y |   |
| HvMAPKK4 | L   | D   | .   | .   | .   | .   | N | T | M | A | M | C | A | T | F | V | G | T | V | T | Y | M | S | P | E | R | I | R | N | E | N | Y | S | . | . | . | . | . | Y | A | D | I | W | S | L | G | L | T | I | L | E | C | A | T | G | K | F | P | Y |   |
| HvMAPKK5 | L   | N   | .   | .   | .   | .   | Q | T | M | D | P | C | N | S | S | V | G | T | I | A | Y | M | S | P | E | R | I | N | T | D | I | N | D | G | A | Y | D | G | Y | A | G | D | I | W | S | F | G | L | S | I | L | E | F | Y | L | G | R | F | P | F |
| HvMAPKK6 | L   | N   | .   | .   | .   | .   | Q | T | M | D | P | C | N | S | S | V | G | T | I | A | Y | M | S | P | E | R | I | N | T | D | L | N | D | G | N | Y | N | G | Y | A | G | D | I | W | S | F | G | L | S | I | L | E | F | Y | L | G | R | F | P | L |

S/TXXXXS/T VGTxxYMSPER
