# Supplementary material for: Genome-wide identification, expression profiles and regulatory network of MAPK cascade gene family in barley
Source: PubMed Central journal article supplement (PMC6796406; doi:10.1186/s12864-019-6144-9), 2019-10-17
Supplement: 12864_2019_6144_MOESM4_ESM.pdf [file 12864_2019_6144_MOESM4_ESM.pdf]

|          | 20                                | 30             | 40              |
|----------|-----------------------------------|----------------|-----------------|
| HvMEKK1  | FLGKGFSEIV                        | GSPYMAP        | EVLKRNYY..GPEID |
| HvMEKK2  | GAPIIG                            | GTPAFMAP       | EVARGEEO.QGPAD  |
| HvMEKK3  | DVPIIG                            | GTPAFMAP       | EVARGEEO.QGPAD  |
| HvMEKK4  | GRPIIG                            | GTPAFMAP       | EVARGEEO.QGPAD  |
| HvMEKK5  | DVPIIG                            | GTPAFMAP       | EVARGEEO.QGPAD  |
| HvMEKK6  | AGPIIG                            | GTPAFMAP       | EVARGEEO.QGPAD  |
| HvMEKK7  | FTPGERFTEIV                       | GSPYMAP        | EVLKRNYY..GQEV  |
| HvMEKK8  | VNTHSVV                           | GTPYWMAP       | EVIEMSG.VCAAS   |
| HvMEKK9  | RRKTFV                            | GTPFWMAP       | EVIQNSDGYNEKAD  |
| HvMEKK10 | DRPLGG                            | TAPAFMAP       | EVARGEEO.QGPAD  |
| HvMEKK11 | LPLMGG                            | TAPAFMAP       | EVARGEEO.QGPAD  |
| HvMEKK12 | DRAIAG                            | TAPAFMAP       | EVARGEEO.QGPAD  |
| HvMEKK13 | FKPGEKFSEIV                       | GSPYMAP        | EVLKRNYY..GPEID |
| HvMEKK14 | AGERFSEIV                         | GSPYMAP        | EVLKRNYY..GPEID |
| HvMEKK15 | AGERFTEIV                         | GSPYMAP        | EVLRRSY..GPEVD  |
| HvMEKK16 | APRGPR                            | GTPAWMAP       | EVARGEEO.QGPAD  |
| HvMEKK17 | RGDRQSRNTFV                       | GTPCWMAP       | EVLQPGTGYNFKAD  |
| HvMEKK18 | SIYETPPASSFSGLPLTHVPQVVLSSSYFSEMA | GTPYWMAP       | EVIHSHVGYGIKAD  |
| HvMEKK19 | MTAAKTMK                          | GTPHWMAP       | EVIHSHVGYGIKAD  |
| HvMEKK20 | RPASHACNRALS                      | CSPDISPNLKAHTA | QKMKKQWKRDR     |
| HvMEKK21 | TMSKRNTFI                         | GTPHWMAP       | EVIQESR.YDQKVD  |
| HvMEKK22 | FRPGERFSEIV                       | GSPYMAP        | EVLKRNYY..GPEID |
| HvMEKK23 | DRPFVGG                           | TAPAFMAP       | EVARGEEO.QGPAD  |
| HvMEKK24 | MINRNGKRHTLV                      | GTPCWMAP       | EVIEMSG.VCAAS   |
| HvMEKK25 | SGDRQARNTFV                       | GTPCWMAP       | EVIEMSG.VCAAS   |
| HvMEKK26 | TGNRQARNTFV                       | GTPCWMAP       | EVIEMSG.VCAAS   |
| HvMEKK27 | DVPIIG                            | GTPAFMAP       | EVARGEEO.QGPAD  |
| HvMEKK28 | DVPIIG                            | GTPAFMAP       | EVARGEEO.QGPAD  |

G(T/S)Px(W/Y/F)MAPEV

|               | 460                                    | 470       | 480          | 490              |             |
|---------------|----------------------------------------|-----------|--------------|------------------|-------------|
| HvRaf-like46  | LSRAMTDSPTDNS                          | SA        | GTPFWMAP     | ELIR...NEPF      |             |
| HvRaf-like123 | MARIFGDNQQ..NAN                        | TQRVV     | GTYGYMAP     | EYAME...GVF      |             |
| HvRaf-like23  | VARVQAKNPQEMTG                         | MTG       | GTPGYMAP     | EYAL...GKPY      |             |
| HvRaf-like62  | LAMSM..ADWPPYN                         | RA        | GTASYMAP     | EMLGKKD...Y      |             |
| HvRaf-like9   | VAFENVYCNTLED                          | DP        | GTYRWMAP     | EMCK...RKPY      |             |
| HvRaf-like86  | LARETVTEMMTA                           | ET        | GTYRWMAP     | ELYSTVTLQRGEKKHY |             |
| HvRaf-like4   | LSRLKHSTFLSSKS                         | TA        | GTPFWMAP     | EVLRR...NEQS     |             |
| HvRaf-like10  | LSKLSRR...NAVGDG                       | LQLSHMR   | GTYGYMAP     | EVLG...LPV       |             |
| HvRaf-like87  | LAKKVSA...STPHLT                       | CTDIT     | GTFGYMAP     | EYFSH...GKV      |             |
| HvRaf-like108 | LSRLKHNTFLSSRS                         | TA        | GTAEMMAP     | EVLRR...NEPS     |             |
| HvRaf-like109 | IAKLINQ...SPADSQ                       | TTGIV     | GTYGYMAP     | EYAFS...TRS      |             |
| HvRaf-like45  | LAKLSGR...NAAGNGDNVG                   | TGVQLSHMR | GTYGYMAP     | EYALG...LPV      |             |
| HvRaf-like98  | FAKLQOR...GQADPG                       | SMSKVR    | GTRGYMAP     | EYVST...APL      |             |
| HvRaf-like33  | LARLFD.GD...RPCTV                      | TSQVV     | GTLGYMAP     | EYAVR...GRM      |             |
| HvRaf-like117 | LAKWLPD...KCTHQV                       | VFPIE     | GTFGYMAP     | EYFMH...GII      |             |
| HvRaf-like50  | LSRLKLETFLTTKT                         | GK        | GTPQWMAP     | EVLRR...SEPS     |             |
| HvRaf-like72  | VARFODQGGIMTA                          | ET        | GTYRWMAP     | EYIN...HQPY      |             |
| HvRaf-like100 | LSKVKQHTLVSG                           | GVR       | GTLPWMAP     | EYLSGK...SDMV    |             |
| HvRaf-like75  | MSRLFGQESR                             | VITESRG   | GTLGYMAP     | EYINN...GVI      |             |
| HvRaf-like24  | LSRFKATTFISSKS                         | VA        | GTPFWMAP     | EVLRR...GEP      |             |
| HvRaf-like2   | LSKLIDR...DQSK                         | VMTVMR    | GTPGYMAP     | EYVLT...SQI      |             |
| HvRaf-like101 | LAQILLKTG...DPASIS                     | VIG       | GTFGYMAP     | EYGYR...LKV      |             |
| HvRaf-like26  | IARFYVDSKLRVTG                         | DSN       | SITAN        | GTLGYMAP         | EYAES...GHA |
| HvRaf-like107 | MARIFGDNQE...NAN                       | TQRVV     | GTFGYMAP     | EYAMQ...GII      |             |
| HvRaf-like57  | LAKLNR...DGSDSG                        | LSRIR     | GTRGYMAP     | EYVSS...LPI      |             |
| HvRaf-like7   | LAKLFS.VD...ASVGN                      | TSHIA     | GTYGYMAP     | EYALH...GIF      |             |
| HvRaf-like11  | LSTWLSK                                | TMSRVR    | GTRGYMAP     | EYVHR...EVI      |             |
| HvRaf-like12  | VARHEAANPSDMTG                         | ET        | GTLGYMAP     | EYVLR...GNAY     |             |
| HvRaf-like85  | LAMS LRTADQTRSS                        | DA        | GTLPYMAP     | EYVLRGKPD...Y    |             |
| HvRaf-like67  | IAKLLLG...DDNSVI                       | CASMP     | GTLGYMAP     | EYVGL...GKL      |             |
| HvRaf-like115 | TSCL ETRCQATKG                         | NK        | GTYRWMAP     | EYIK...EKPY      |             |
| HvRaf-like88  | LAKLDRRP...EGSASRGR                    | EANPSRRIR | GTRGYMAP     | EYVSS...LAI      |             |
| HvRaf-like21  | LARLFG.SD...QSHDV                      | TNRVV     | GTYGYMAP     | EYAMR...GSY      |             |
| HvRaf-like90  | LAKIFSSNN...NEGK                       | TRKVV     | GTYGYMAP     | EYASH...GLF      |             |
| HvRaf-like92  | VARVKDTSQVMTA                          | ET        | GTYRWMAP     | EYIE...HKPY      |             |
| HvRaf-like43  | LAKLAKR...DSASFN                       | FTHMR     | GTMGYMAP     | EYALN...TPI      |             |
| HvRaf-like34  | MARLFLED...ATHVN                       | TFRIS     | GTYGYMAP     | EYAMN...GYL      |             |
| HvRaf-like35  | LAKIFSSND...TEEDI                      | TNRVV     | GTYGYMAP     | EYASK...GIF      |             |
| HvRaf-like63  | LSRLKHSTFLSSKS                         | TA        | GTPFWMAP     | EVLRR...NEQS     |             |
| HvRaf-like6   | MARIFGGDDS...EIN                       | TLRVV     | GTYGYMAP     | EYAMD...GVF      |             |
| HvRaf-like120 | MDTLWKGGYSDLQMAEAYC                    | V         | GQFVRLR      | PHTSSP...RFEW    |             |
| HvRaf-like25  | TARMLGVHLTDAAAPDSAT                    | SSAFR     | GTVGYMAP     | EYLAYM...KSP     |             |
| HvRaf-like54  | LSKLTSKK                               | EKVMSRIR  | GTRGYMAP     | EYVHR...EPI      |             |
| HvRaf-like83  | IARLL...DDNSMI                         | SGSMP     | GTVGYMAP     | EYVGL...GKA      |             |
| HvRaf-like14  | LARLQEGH...THTQ                        | TTRAA     | GTLGYMAP     | EYAVH...GSV      |             |
| HvRaf-like119 | LSKVKCQTLISGG                          | VR        | GTLPWMAP     | EYVLR...GSSSLV   |             |
| HvRaf-like19  | LARLFG.AD...QSREV                      | TNRVV     | GTYGYMAP     | EYAMR...GHY      |             |
| HvRaf-like36  | LAKIFSLND...IEGDI                      | TNRVV     | GTYGYMAP     | EYASK...GNF      |             |
| HvRaf-like122 | LSKLSGR...KAVGDG                       | VQLSHMR   | GTTGYMAP     | EYVLR...LPI      |             |
| HvRaf-like96  | LARETVTEMMTA                           | ET        | GTYRWMAP     | EYYSTVTLRHGEKKHY |             |
| HvRaf-like95  | LSRLSNSAMS DNS                         | SA        | GTPFWMAP     | ELIR...NEPF      |             |
| HvRaf-like77  | LAKIFGRD...QTQGV                       | TNRVV     | GTHGYMAP     | EYVMMR...GNY     |             |
| HvRaf-like121 | LAKLYKR...DGSSFN                       | FSHMR     | GTDGYMAP     | EYVAMN...LPI     |             |
| HvRaf-like113 | LSRLFGEQQR                             | ACTINRD   | GTFGYMAP     | EYVLR...GII      |             |
| HvRaf-like55  | HARVVTGG...PAASHL                      | STQAA     | GTAGYMAP     | EYVIREG...VGA    |             |
| HvRaf-like88  | IARLL...DDNSIT                         | STSM      | GTVGYMAP     | EYVGL...GKA      |             |
| HvRaf-like116 | LARLIDHDR...ASQ                        | TTVLA     | GTMGYMAP     | EYVTT...GKA      |             |
| HvRaf-like8   | LARILAEAAAGTTPHDIMS                    | AVA       | GTFGYMAP     | EYVCA...RKA      |             |
| HvRaf-like74  | HARFLPDGGQALTG                         | ET        | GTYVYMAP     | EYVIR...CEPY     |             |
| HvRaf-like5   | LAMSM..ADWPPYN                         | RA        | GTASYMAP     | EMLGKKD...Y      |             |
| HvRaf-like71  | LSRLKRETYLTTKT                         | GK        | GTPQWMAP     | EVLRR...NEPS     |             |
| HvRaf-like105 | LSKVKCQTLISGG                          | VR        | GTLPWMAP     | EYVLR...GSSNLV   |             |
| HvRaf-like82  | VARVEAQDDDNMTG                         | QT        | GTLGYMAP     | EYVLE...GRPY     |             |
| HvRaf-like20  | LARLFG.SD...QSHDV                      | TNRVV     | GTYGYMAP     | EYAMR...GNY      |             |
| HvRaf-like78  | LARLLEGH...THTK                        | TSGAV     | GTLGYMAP     | EYAIH...GRV      |             |
| HvRaf-like99  | LSRLKLDLTLSTKT                         | GK        | GTPQWMAP     | EVLRR...SEPS     |             |
| HvRaf-like70  | LSRLKRNTLVSGG                          | VR        | GTLPWMAP     | EYVLR...GSSSRV   |             |
| HvRaf-like80  | LSKLSGR...KAVGDG                       | VQLSHMR   | GTTGYMAP     | EYVLR...LPI      |             |
| HvRaf-like112 | VARLGSQEGQMTA                          | ET        | GTYRWMAP     | EYVLR...HKPY     |             |
| HvRaf-like1   | LARLALD...AVTHVT                       | TR.VM     | GTFGYMAP     | EYVASS...GKL     |             |
| HvRaf-like3   | LARNFMEDQ...THLS                       | TG.LA     | GTFGYMAP     | EYVIVH...GQL     |             |
| HvRaf-like30  | LARLLEGH...THTK                        | TSRAV     | GTLGYMAP     | EYVYN...RRV      |             |
| HvRaf-like68  | LSRLIDR...EDSH                         | VVTRMR    | GTPGYMAP     | EYVLR...SKI      |             |
| HvRaf-like110 | LAMIMDQ...GKAIV                        | TTEIQ     | GTYGYMAP     | EYVRS...GKA      |             |
| HvRaf-like59  | LSRLKIETFLTTKT                         | GK        | GTPQWMAP     | EVLRR...NEPS     |             |
| HvRaf-like104 | VSAI IASSAQRDT                         | FT        | GTFNYMAP     | EYVIRSGQK...H    |             |
| HvRaf-like106 | IAKIMDQ...CSAAPQ                       | TTGVV     | GTTGYMAP     | EYVLR...TRN      |             |
| HvRaf-like27  | LSRLLDEQQT                             | ICTSSRD   | GTLGYMAP     | EYVLR...GTI      |             |
| HvRaf-like13  | IARIFG.QD...QTHGI                      | TNRVV     | GTYGYMAP     | EYVVMR...GNY     |             |
| HvRaf-like18  | LARLFG.RD...QTQAV                      | TSRVV     | GTYGYMAP     | EYVVMR...GNY     |             |
| HvRaf-like22  | MARIFGSNM...TEAN                       | TNRVV     | GTYGYMAP     | EYVYASQ...GLF    |             |
| HvRaf-like103 | MARIFSSNM...TEAN                       | TNRVV     | GTYGYMAP     | EYVYASG...GFF    |             |
| HvRaf-like49  | MARIFDPKGG...LAN                       | TKRVV     | GTYGYMAP     | EYVYAMA...GIF    |             |
| HvRaf-like118 | VARIEVKTEGMP                           | ET        | GTYRWMAP     | EYVMIQ...HRPY    |             |
| HvRaf-like89  | LAKIFSSND...TEGNI                      | TRRVI     | GTYGYMAP     | EYVASK...GIF     |             |
| HvRaf-like84  | LSKMKQATMVSGG                          | MRGTL     | PLPWMAP      | EYVLR...MSGTKV   |             |
| HvRaf-like31  | ISCL ESQCGSGKG                         | FT        | GTYRWMAP     | EYVMIK...EKNH    |             |
| HvRaf-like91  | LSKIKRNTLVSGG                          | VR        | GTLPWMAP     | EYVLR...GSSSKV   |             |
| HvRaf-like61  | LAIMS...SDKPPYN                        | QA        | GTSYMAP      | EYVIMGKRD...Y    |             |
| HvRaf-like94  | MSRLKHNTFLSSKS                         | TA        | GTPFWMAP     | EVLRR...NEPA     |             |
| HvRaf-like111 | VARI EVKTEGMP                          | ET        | GTYRWMAP     | EYVMIQ...HRPY    |             |
| HvRaf-like32  | LARLAMD...FATHVT                       | TR.VM     | GTFGYMAP     | EYVASS...GKL     |             |
| HvRaf-like51  | LARLDPQQT                              | IITSSRD   | GTLGYMAP     | EYVLR...GKV      |             |
| HvRaf-like44  | LAKLSKL...DSSSFN                       | LTHMR     | GTMGYMAP     | EYVLR...LPI      |             |
| HvRaf-like102 | SADLAGELPDDDDGDGKEGRHRTG               | SRGRIE    | GTRGYMAP     | EYVLR...GSP      |             |
| HvRaf-like124 | TSCL ESHSSRAGAGAGAGT GAGAGGGGSGEGRGTNM | GTYRWMAP  | EYVVR...DKPC |                  |             |
| HvRaf-like47  | IACEEAYCDPLAN                          | DP        | GTRFWMAP     | EYVMIK...HKPY    |             |
| HvRaf-like73  | MARLFPEAGD...GRSHVQ                    | T.RVA     | GTFNWMAP     | EYVLR...GHL      |             |
| HvRaf-like65  | VSAVLASSIGQRDT                         | FV        | GTYNYMAP     | EYVIRSGSS...Y    |             |
| HvRaf-like48  | MARIFDPKGG...LAN                       | TKRVV     | GTYGYMAP     | EYVYAMA...GIF    |             |
| HvRaf-like93  | LSRFFCEKQSQ                            | ILTAEVK   | GTLGYMAP     | EYVFN...GQI      |             |
| HvRaf-like52  | LAKIFSSND...TQGS                       | TKKVV     | GTYGYMAP     | EYVASE...GII     |             |
| HvRaf-like66  | MARFMFGNOO...KAD                       | TKRVV     | GTYGYMAP     | EYVYAMR...GIF    |             |
| HvRaf-like28  | LSRVLHPGEYAE                           | AC        | GTRLYMAP     | EYVLMFQK...Y     |             |
| HvRaf-like60  | LAMFM...ADWPPYN                        | RA        | GTSYMAP      | EYVLR...GKL      |             |
| HvRaf-like79  | VARVKVQSGVMTA                          | ET        | GTYRWMAP     | EYVMIK...LS      |             |
| HvRaf-like39  | IACEETLCLLLE                           | DE        | GTYRWMAP     | EYVMIK...RKPY    |             |
| HvRaf-like41  | VARVEASNPSDMTG                         | ET        | GTLGYMAP     | EYVLR...GHPY     |             |
| HvRaf-like64  | LARLYEHGA...TAG                        | TTRVA     | GTLGYMAP     | EYVLR...SRA      |             |
| HvRaf-like29  | VSRQRSQEGDMTA                          | ET        | GTYRWMAP     | EYVLR...HKPY     |             |
| HvRaf-like81  | VARVEAQNPKDMTG                         | AT        | GTLGYMAP     | EYVLR...GKPY     |             |
| HvRaf-like38  | LARAFAADI...THLT                       | TG.VA     | GTLGYMAP     | EYVVR...GHL      |             |
| HvRaf-like56  | FAKL LSR...TGSNQN                      | VSRAR     | GTLGYMAP     | EYVVR...LPI      |             |
| HvRaf-like37  | LAKIFSSNI...TEANT                      | TRKVV     | GTYGYMAP     | EYVYASH...GIF    |             |
| HvRaf-like16  | LARLIDHDR...ASQ                        | TTVLA     | GTMGYMAP     | EYVTT...GKA      |             |
| HvRaf-like40  | LAKLTND...AMTHVS                       | TR.VM     | GTFGYMAP     | EYVASS...GKL     |             |
| HvRaf-like17  | LAKLFS.WD...QSQAV                      | TSHIA     | GTYGYMAP     | EYVYAMR...GQY    |             |
| HvRaf-like97  | MAMIFEDE...IEVIN                       | TGHVV     | GTYGYMAP     | EYVYAMG...GVF    |             |
| HvRaf-like15  | IAKLFSNIDD...NQDSTV                    | TERIV     | GTFGYMAP     | EYVYAMD...GMV    |             |
| HvRaf-like76  | MSRLFGKQQR                             | IITKSRG   | GTFGYMAP     | EYVITN...GLI     |             |
| HvRaf-like69  | LAKILDAGGKQGEPPWSSSG                   | GGAVA     | GTVGYMAP     | EYVYAYT...RKV    |             |
| HvRaf-like42  | LSKL SER...DSSSLN                      | FTQMR     | GTTGYMAP     | EYVVMN...LPI     |             |
| HvRaf-like114 | LARMLVKSG...ELESVS                     | AIG       | GTFGYMAP     | EYVYASR...LRV    |             |
| HvRaf-like53  | LSRLKANTYLSSKS                         | LA        | GTPFWMAP     | EVLRR...DEPS     |             |

GTxx(W/Y)MAPE

|        | 240        | 250   | 260         | 270 | 280                    | 290         |
|--------|------------|-------|-------------|-----|------------------------|-------------|
| HvZIK1 | LAAIVDKDHT | AHTII | GTPEFMAPELY | SE  | ETYTESVDIYSYGMCVLEMVTR | EMFYRRECESV |
| HvZIK2 | LAAILRKSHA | VH.CV | GTPEFMAPEVY | AE  | EYNELVDIYSFGMCVLEMVTR  | FEPYSECTHPV |
| HvZIK3 | LAAVLRGAQA | AHSV  | GTPEFMAPEMY | DE  | EDYDELVDVYSFGMCVLEMVTR | FEPYSECTHPV |
| HvZIK4 | LAAIMRTP.K | ARSV  | GTPEFMAPELY | DE  | EDYDELVDVYSFGMCVLEMVTR | FEPYSECTHPV |

GTPEFMAPE(L/V)Y
