# Supplementary material for: Genome-wide identification, expression profiles and regulatory network of MAPK cascade gene family in barley
Source: PubMed Central journal article supplement (PMC6796406; doi:10.1186/s12864-019-6144-9), 2019-10-17

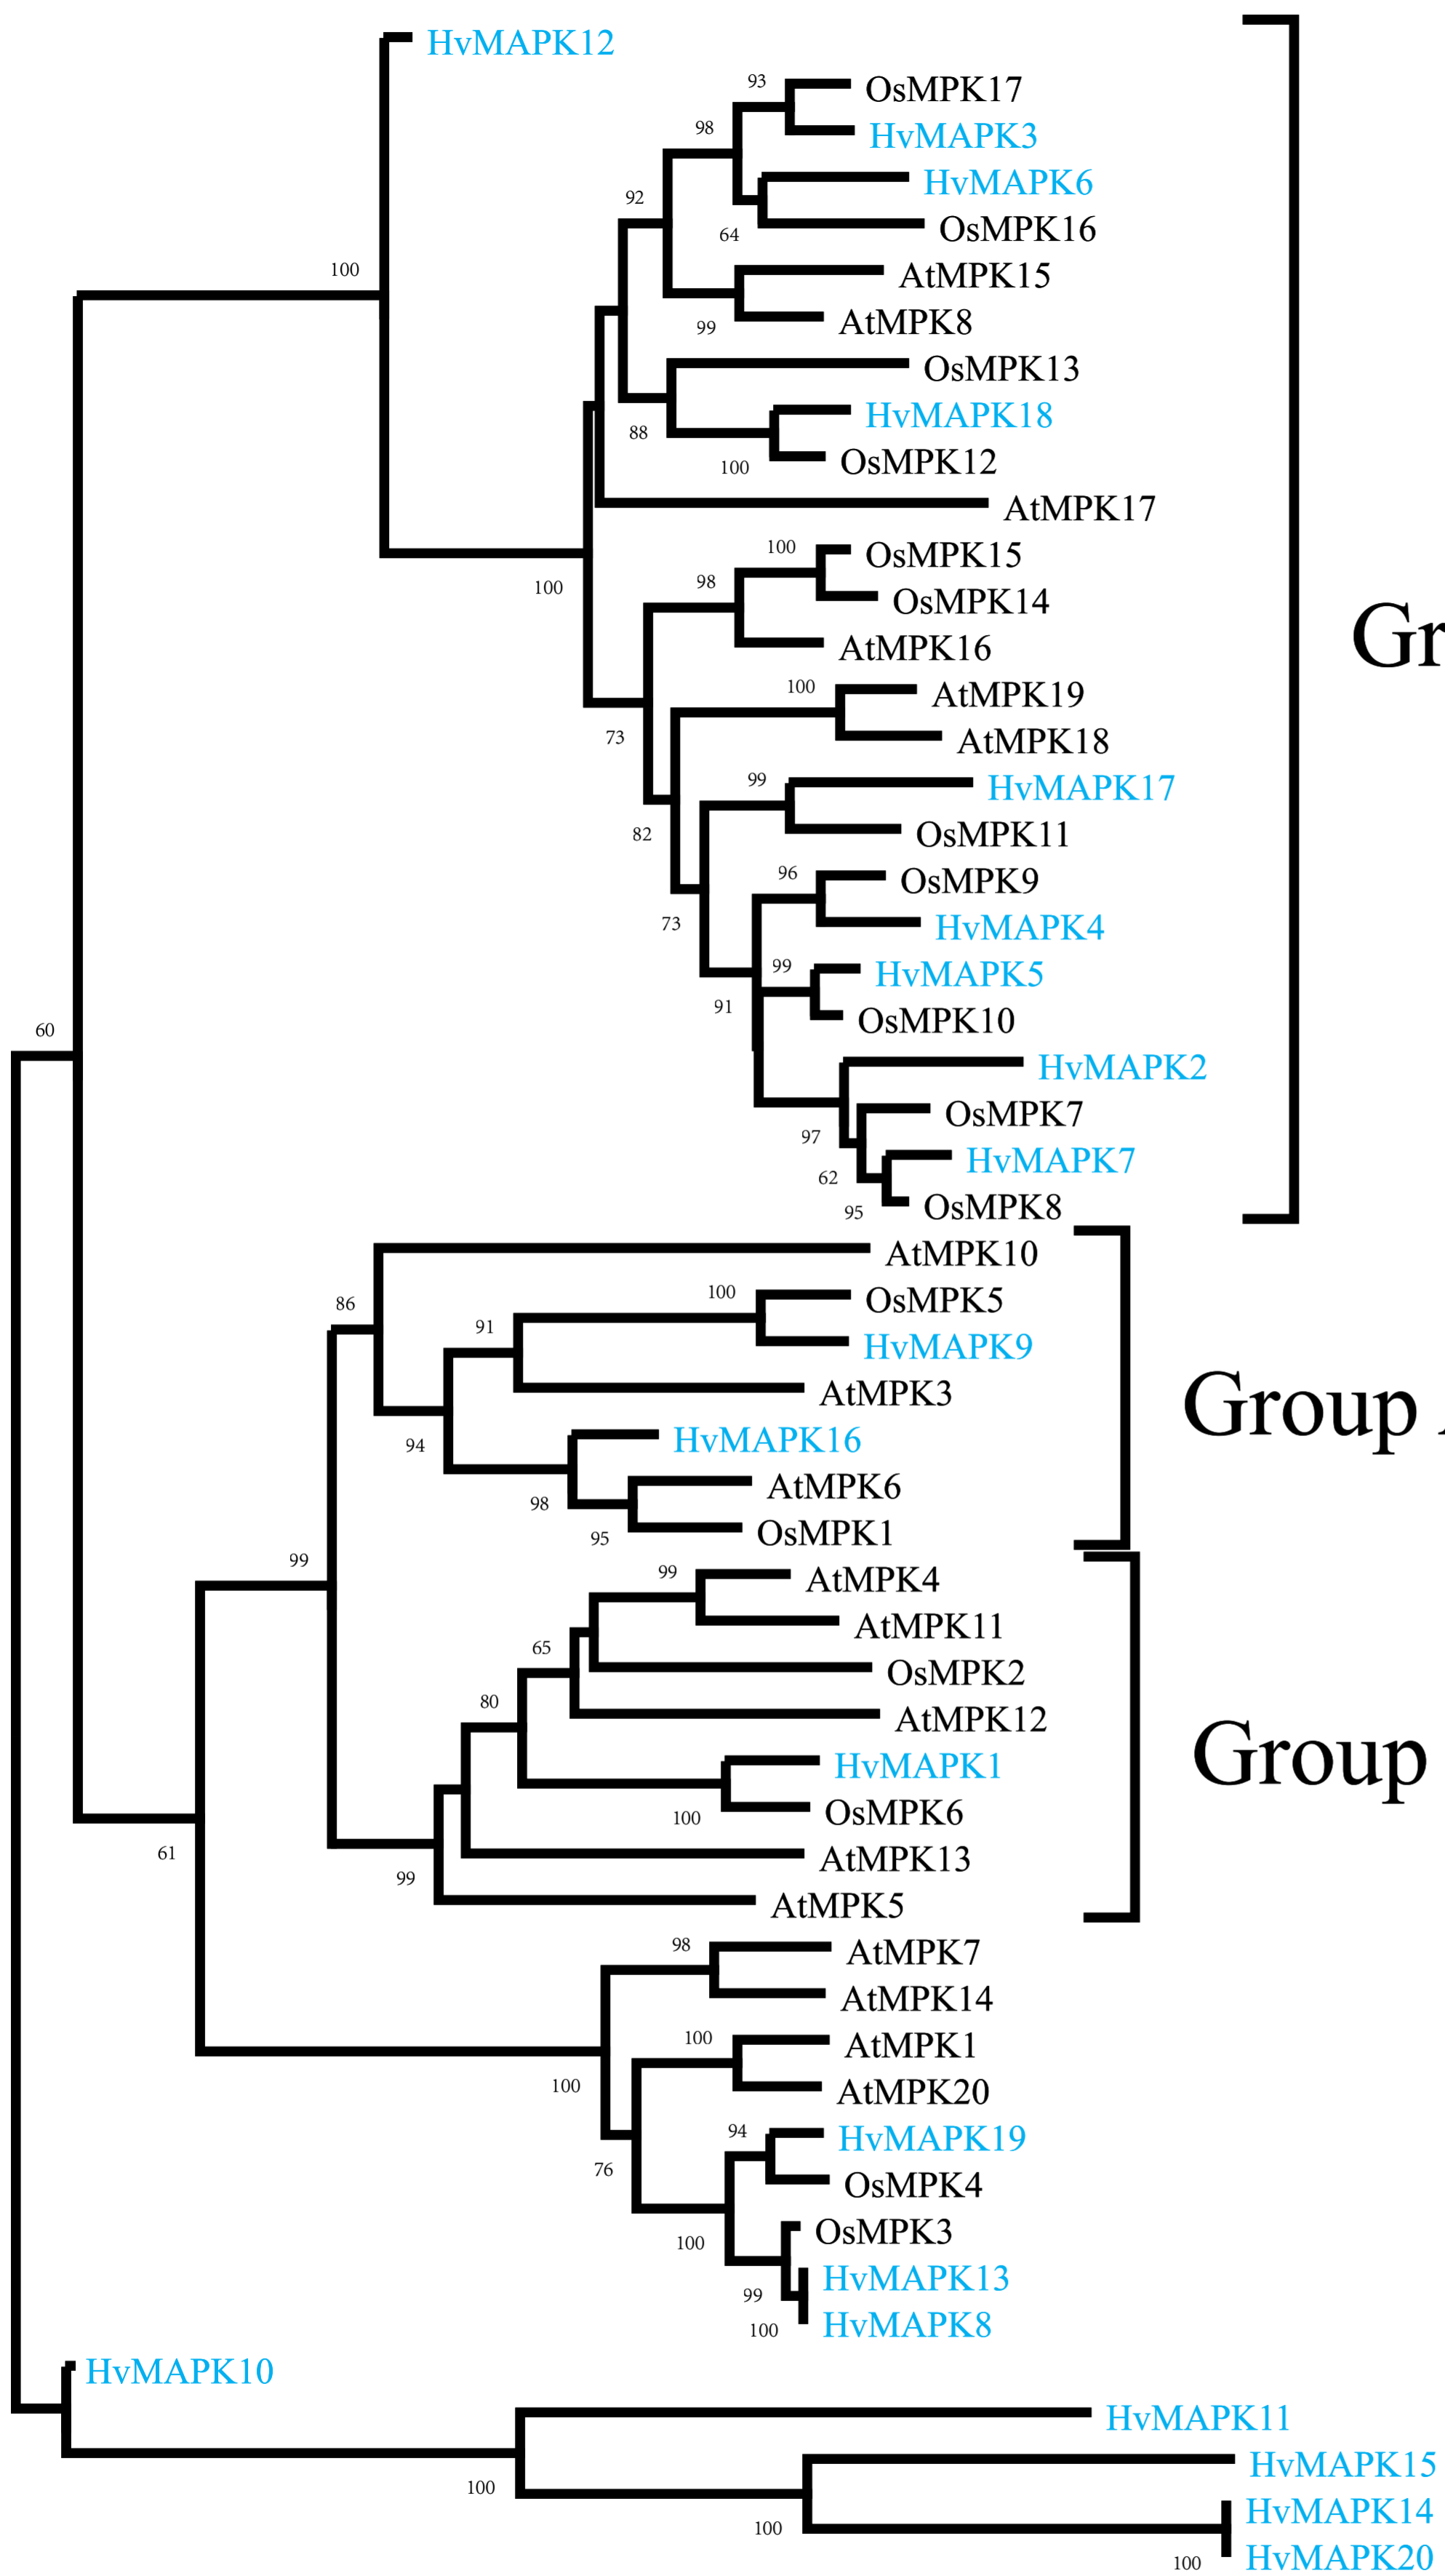

Group D

Group A

Group B

Group C

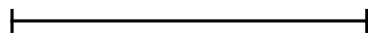

Supplement: 12864_2019_6144_MOESM5_ESM.pdf [file 12864_2019_6144_MOESM5_ESM.pdf]
